# 1 The impact of brain lesions on tDCS-induced 2 electric field magnitude

3

4 Ainslie Johnstone <sup>1</sup>, Catharina Zich <sup>1,2</sup>, Carys Evans <sup>1</sup>, Jenny Lee <sup>1</sup>, Nick Ward <sup>1,3,4</sup>, Sven  
5 Bestmann <sup>1,5</sup>

6

## 7 Affiliations

8 1. Department for Clinical and Movement Neuroscience, UCL Queen Square Institute of

9 Neurology, University College London, London, UK

10 2. Wellcome Centre for Integrative Neuroimaging, FMRIB, Nuffield Department of Clinical

11 Neurosciences, University of Oxford, Oxford, UK

12 3. The National Hospital for Neurology and Neurosurgery, London, UK

13 4. UCLP Centre for Neurorehabilitation, London, UK

14 5. Wellcome Centre for Human Neuroimaging, UCL Queen Square Institute of Neurology,

15 University College London, London, UK

16

17 Word Count: main text ~3800 words + 245 word abstract

18

19

20

## 21 Highlights

22 - Lesions can alter tDCS-induced electric field magnitude (e-mag) in a target by 30%

23 - The effect of a lesion is greatest if it is large and close to the target

24 - Lesion conductivity - the true value for which is unknown - also impacts the change

25 - Lesions can cause increases or decreases to e-mag

26 - Direction of change depends on the position of the lesion relative to current flow

27

## 28 Abstract (241 words)

29

30 Background: Transcranial direct current stimulation (tDCS) has been used to enhance motor and language  
31 rehabilitation following a stroke. However, improving the effectiveness of clinical tDCS protocols depends  
32 on understanding how a lesion may influence tDCS-induced current flow through the brain.

33

34 Objective: We systematically investigated the effect of brain lesions on the magnitude of electric fields (e-  
35 mag) induced by tDCS.

36

37 Methods: We simulated the effect of 630 different lesions - by varying lesion location, distance from the  
38 region of interest (ROI), size and conductivity - on tDCS-induced e-mag. We used current flow models in  
39 the brains of two participants, for two commonly used tDCS montages, targeting either primary motor  
40 cortex (M1) or Broca's area (BA44) as ROIs.

41

42 Results: The effect on *absolute* e-mag change was highly dependent on lesion size, conductance and  
43 distance from ROI. Larger lesions, with high conductivity, close to the ROI caused e-mag changes of more  
44 than 30%. The *sign* of this change was determined by the location of the lesion. Specifically, lesions located  
45 in-line with the predominant direction of current flow increased e-mag in the ROI, whereas lesions located  
46 in the opposite direction caused a decrease.

47

48 Conclusions: These results demonstrate that tDCS-induced electric fields are profoundly influenced by  
49 lesion characteristics. This highlights the need for individualised targeting and dose control in stroke.  
50 Additionally, the variation in electrical fields caused by assigned conductance of the lesion underlines the  
51 need for improved estimates of lesion conductivity for current flow models.

52

53

54 **Keywords:**

55 tDCS, current flow modelling, brain lesions, stroke, electric field

## 56 Introduction

57 Transcranial direct current stimulation (tDCS) is proposed as an economical and non-invasive method of  
58 enhancing recovery after stroke when paired with behavioural training [1–10]. However, the effects of  
59 tDCS vary substantially across individuals [11,12] making adoption into routine clinical practice difficult.  
60 Individual differences in brain and skull anatomy lead to large variations in how much current reaches the  
61 target brain regions [13,14]. This leads to unacceptable variability in the physiological and behavioural  
62 effects of tDCS across individuals [11,12]. Variability is likely to be further exacerbated in stroke patients  
63 where lesions may distort current flow [15]. For example, lesion size and location could influence current  
64 flow and are unlikely to be identical in any two patients. Moreover, while it is known that lesions have  
65 different conductance compared to healthy brain tissue [16] the magnitude of this difference is not  
66 known, and it remains unclear how this affects current flow.

67 The amount of current, and the path it takes through an individual's brain, can be estimated using current  
68 flow modelling [17,18]. Here, high-resolution volume conduction models, usually based on individual MRI  
69 scans, apply the laws of electromagnetic induction to the complex geometry of the head and brain. These  
70 are often finite element models where the head is segmented into different tissue types, each with an  
71 assigned conductivity. Current flow models can be used to estimate variability across individuals [14],  
72 determine the individual stimulation intensities required to generate equivalent electric fields across  
73 participants [13], or even optimise the electrode location to target specific regions [19–21].

74 These models have been applied to the brains of stroke patients [15,21–23] with some studies finding  
75 profound effects of the lesioned tissue on current flow [15,22]. Despite these efforts, the multi-faceted  
76 nature of lesion characteristics and the complexities of their influence(s) on current flow remain unknown.  
77 Previous studies are based on the results from one or two example lesions. Across patients, lesions tend to  
78 be confined to certain vascular territories but there is large variation in lesion characteristics within these  
79 regions, and in principle all areas of the brain have the potential to be affected [24]. Additionally, large  
80 variations in stroke size and location can produce similar symptoms [25,26], meaning study or treatment  
81 groups are unlikely to have homogenous lesions. This makes it difficult to generalise the conclusions of  
82 these previous modelling studies and make decisions on how to incorporate these findings into protocols  
83 for individual patients with potentially very different lesions.

84 A further issue is that the validity of results from current flow modelling simulations rely on the accuracy of  
85 tissue segmentation and choice of correct conductance values. Previous studies have opted to model  
86 lesions with conductance equivalent to cerebral spinal fluid (CSF) [15,21–23] but the actual conductance  
87 value of this tissue is not known. Estimates obtained from various MRI techniques vary 10-fold [16],  
88 ranging from values below that of typical grey and white matter conductance, to above the value typical

89 assigned to CSF. The influence that changes in lesion conductance have on current flow simulations  
90 remains unclear.

91 In this study, we systematically assessed the influence of synthetic lesions on induced electric field  
92 magnitude within two regions of interest: M1 and BA44. By using artificial lesions we could independently  
93 vary their location, distance, size and conductance and determine general patterns or rules that govern  
94 how lesions might alter current flow. Such knowledge can guide optimisation of montages across different  
95 study populations and future research into current flow modelling in stroke.

## 96 Methods

### 97 Overview

98 A variety of synthetic spherical lesions were modelled in the brains of two example participants, for two  
99 different electrode montages. For each montage a region of interest was defined- motor cortex (M1) and  
100 Broca's area (BA44)- and lesions differed in their cardinal direction from the ROI, distance from ROI and  
101 size. For each lesion, simulations were run using a range of conductance values.

102

103

### 104 Participants

105 The T1-weighted 3D structural MR scans of two healthy females were used in this analysis, both of whom  
106 gave informed consent to have their scans used for this purpose. The project was approved by the UCL  
107 Research Ethics Committee (project no: 14233/001). P01 was 26 years old at time of scanning, P02 was 25  
108 years old. Both scans took place at the Wellcome Centre for Human Neuroimaging at UCL (WCHN, UCL) on  
109 a Siemens 3 Tesla TIM Trio scanner with 64-channel head coil (176 sagittal slices, matrix size 256 x 256,  
110 1mm isotropic resolution, TR/TE=1900/3.96).

111

### 112 Current flow modelling

113 Current flow modelling was performed using a custom version of ROAST 2.7 [27]. ROAST is a fully  
114 automated, open-source MATLAB application that performs segmentation of the brain image (via SPM),  
115 places virtual electrodes, performs volumetric meshing (via Iso2Mesh- Fang & Boas, 2009) and solves the  
116 finite element model numerically to estimate current flow. By default, ROAST segments the image into 6  
117 tissue types (skin, bone, CSF, grey matter, white matter and air). We modified ROAST (i.e. ROAST-lesion) to  
118 incorporate a seventh tissue type (lesion). Consequently, volumetric meshing and solving the finite  
119 element model was performed using the 7-tissue head model. With the exception of the additional lesion  
120 and the tDCS montage information ROAST 2.7 default settings were used for all simulations. Code for  
121 ROAST-lesion is available at [*code provided upon acceptance*].



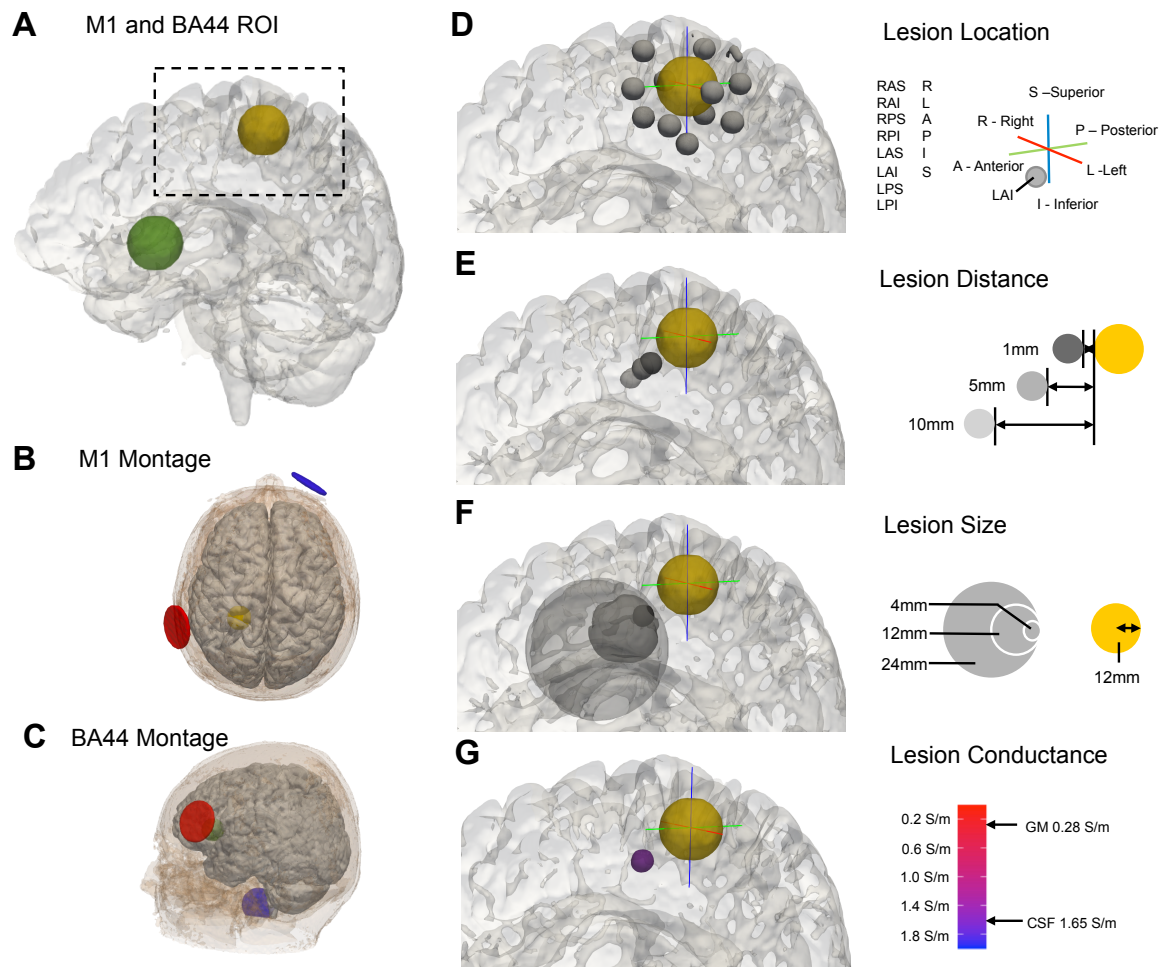

122

**Figure 1: Modelled lesion parameters**

A: Rendered brain of example participant (P01) with M1 ROI (yellow) and BA44 ROI (green).  
B: tDCS montage targeting M1, with anode in red, cathode in blue.  
C: BA44 tDCS montage.  
D: The 14 potential lesion directions N.B. lesions where the central voxel was outside the brain were omitted.  
E: The three different lesion distances (1mm, 5mm, 10mm), where distance was measured as the shortest Euclidean distance from the edge of the ROI to the edge of the lesion.  
F: The three different lesion sizes, defined by lesion radius ( 4mm, 12mm, 24mm).  
G: The five different lesion conductivities (0.2S/m, 0.6S/m, 1S/m, 1.4S/m, 1.8S/m)

123 tDCS stimulation montages

124 Two montages with utility in stroke rehabilitation research were selected for this study. One typically used  
125 in motor rehabilitation research [29,30] to target M1, where the anode is applied over left primary motor  
126 cortex (M1) and the cathode over right supraorbital ridge. Specifically, we placed electrodes over 10-05  
127 coordinates Fp2 and CCP3 for both participants. For the other montage, often used in aphasia  
128 rehabilitation studies [7,8] to target BA44, the anode is positioned over left frontal cortex (BA44) and the  
129 cathode on the right neck. Specifically, we placed the electrodes over Exx20 and FFT7h for participant one  
130 (P01) and over Exx20 and F7h for participant two (P02).

131

132 The choice of locations used here are intended to be taken as examples of potential montages. In reality,  
133 for many tDCS studies the exact locations of stimulation are individualised either to target intact tissue or  
134 to target anatomically or functionally defined regions [31,32]. All simulations were run with an applied  
135 current strength of 1mA. It should be noted that, in line with Ohm's Law, e-mag values will scale linearly  
136 with increases in applied current given constant conductance. All simulations used disk electrodes of  
137 radius 17mm and depth 2mm.

138

### 139 Lesions

140 Synthetic lesions were positioned relative to the regions of interest (ROI). ROIs were 12mm radius spheres  
141 centred at manually defined M1 hand knob, or BA44. All lesions were spherical and constrained to the grey  
142 and white matter. The lesions were positioned relative to their cardinal direction from the ROI; either due  
143 right (R), left (L), anterior (A), posterior (P), superior (S), inferior (I), right-anterior-superior (RAS), right-  
144 anterior-inferior (RAI), right-posterior-superior (RPS), right-posterior-inferior (RPI), left-anterior-superior  
145 (LAS), left-anterior-inferior (LAI), left-posterior-superior (LPS), or left-posterior-inferior (LPI) of the ROI (see  
146 Figure 1). Lesions varied in distance from the ROIs (shortest Euclidean distance from edge of ROI to edge of  
147 lesion: 1mm, 5mm, 10mm), and in size (radii: 4mm, 12mm, 24mm). Lesions were not designed to be  
148 morphologically or anatomically realistic, but rather to ensure comparability and quantification of the  
149 impact on electrical fields.

150

151 Current flow simulations were only performed if the centre of the lesion was within the brain, and if the  
152 volume of the lesion was at least 20% of the maximum potential volume. If these conditions were met,  
153 then simulations were run with a variety of different lesion conductivities (0.2 S/m, 0.6 S/m, 1 S/m, 1.4  
154 S/m, 1.8 S/m) which ranged from roughly the conductance of grey and white matter (0.28 S/m and 0.13  
155 S/m respectively) to above that of CSF (1.65 S/m), spanning the range of values reported in McCann et al.,  
156 2019. Out of a possible 630 simulations, a total of 490 and 409 M1 simulations, and 435 and 355 BA44  
157 were run for P01 and P02 respectfully. Note that there are fewer simulations for the BA44 montage due to  
158 the close proximity of the lesion to the cortical surface.

159

### 160 Simulation outputs and independent variables

161

162 Electric field magnitude (e-mag) images, measured in V/m, were extracted for each lesion simulation.  
163 Additionally, for each participant, and each montage, a simulation without lesions was performed to  
164 obtain estimates of e-mag within the 'healthy' non-lesioned brain. The e-mag change for each lesion was  
165 calculated by subtracting the non-lesioned e-mag image from the lesioned e-mag image. The mean e-mag  
166 change from within the grey matter (GM) of the target ROI was calculated, as well as the 16<sup>th</sup> and 84<sup>th</sup>  
167 percentile values from within these voxels (see Figure 2)

168

169 From the non-lesioned simulation, for each participant, and each montage, the electric field in each  
170 direction (R-L, A-P, S-I) for all voxels across the brain was also extracted. The electric field direction vector  
171 was calculated, in each participant, for each montage, using the mean electric field in each direction from  
172 all the grey matter voxels within the target ROI.

173

174 Lesion distance, size and conductivity were treated as continuous numerical variables in all analyses. In  
175 order to quantify lesion location and allow for comparison between montages, the angle between the 3D  
176 direction vector indicating the movement from the ROI to the lesion, and the 3D electric field direction  
177 vector from within the GM of the ROI in the non-lesioned simulation was calculated (see Figure 2E). This  
178 created a measure of the degree to which the lesion was located in the path of current flow.

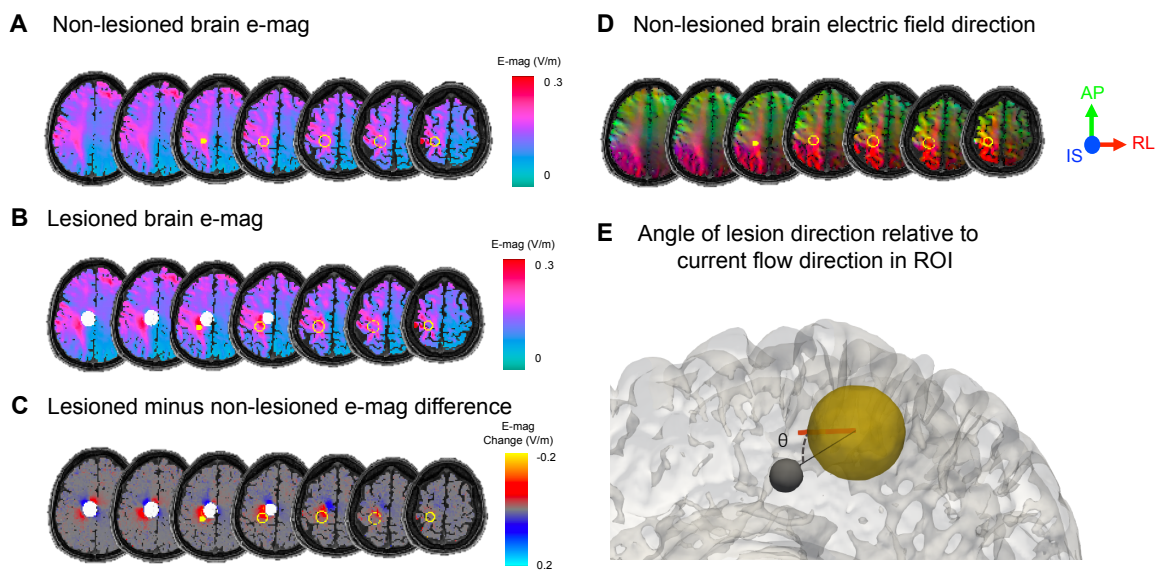

179

### Figure 2: Current flow modelling

A: Electric field magnitude (e-mag) image for M1 montage for the non-lesioned 'healthy' brain of a single subject. M1 outlined in yellow.

B: E-mag image for same montage but in a lesioned brain (filled white circle; RAI lesion, distance 1mm, size 12mm, conductivity 1.2S/m).

C: Difference image (lesioned minus non-lesioned brain). Note the strong increases and decreases around the lesion, reaching magnitudes of approximately +/-0.1V/m.

D: Electric field direction across the brain, coloured by predominant direction of current flow.

E: Calculation of angle between the lesion direction (black line) and the average direction of electric field within the grey matter of the ROI (orange line).

## 180 Analysis

181 All MRI manipulations were performed using tools from the FMRIB software library (FSL; Jenkinson et al.,  
182 2012) and all data analysis was performed using R v4.0.3 in RStudio v1.3.1093.

183

184 Results

185 Larger lesions, closer to the ROI, with higher conductivity have a greater impact on e-  
186 mag change within ROIs

187 First, we evaluated the effects of lesion distance, size and conductivity on the *absolute* mean e-mag of the  
188 ROI. To this end we used two linear mixed effect models, one for the M1 montage and one for the BA44  
189 montage, with participant as a random effect impacting intercept. For both montages, lesions with closer  
190 distance (M1:  $F(1,894)=16.9$ ,  $\beta=-0.99$ ,  $p=4.3e-5$ , Figure 3A; BA44:  $F(1,785)=46.6$ ,  $\beta=-1.05$ ,  $p=2.1e-11$ ,  
191 Figure 3D), larger size (M1:  $F(1,894)=90.4$ ,  $\beta=2.31$ ,  $p<2.2e-16$ , Figure 3B; BA44:  $F(1,785)=178$ ,  $\beta=2.11$ ,  
192  $p<2.2e-16$ , Figure 3E), and higher conductance (M1:  $F(1,894)=27.4$ ,  $\beta=2.25$ ,  $p=1.4e-10$ , Figure 3C; BA44:  
193  $F(1,785)=54.6$ ,  $\beta=1.63$ ,  $p=3.8e-13$ , Figure 3F) had a greater impact on absolute change in e-mag within the  
194 ROI.

195  
196 There was no change in the significance of results if data from both montages/ROIs were included  
197 together in one linear mixed model with montage included as an additional random effect. Adding  
198 montage as a fixed effect also did not change results, and there were no significant interactions between  
199 montage and the other variables ( $p>0.14$ ) indicating that there was not a significant difference in the effect  
200 of lesion distance, size or conductivity on e-mag change between the M1 and BA44 simulations.

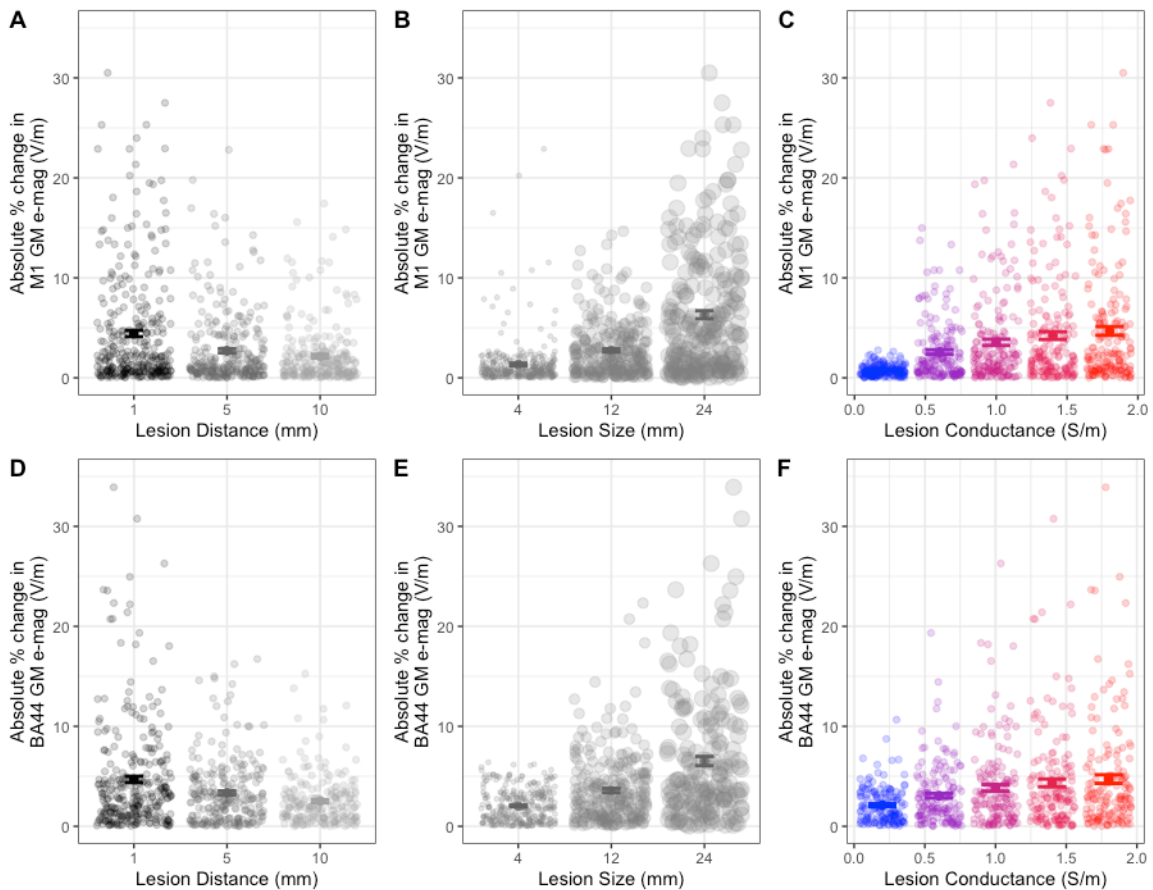

201

**Figure 3: Larger lesions, closer to the ROI, with high conductivity have a greater impact on electric field magnitude (e-mag) change within the ROI**

A-C: Scatter plots with mean and standard error (SE) of the *absolute* percentage e-mag changes in M1 caused by lesions with different sizes, distances and conductance. Data are the results from individual simulations and pooled from both participants for analysis.

D-F: Scatter plots with mean and SE of *absolute* e-mag change in BA44 GM. Individual data points are jittered on the x-axis for display purposes.

202 Lesions in the path of current flow increase e-mag, while those in the opposite  
203 direction cause e-mag decreases

204 We went on to investigate the main effect of lesion location on the mean e-mag in ROI. Lesions due R, RAS  
205 and RAI of left M1 caused increases in M1 e-mag, whereas lesions due inferior, LPI, LAI or RPI tended to  
206 decrease M1 e-mag (see Figure 4 for selected examples, and Supplementary Figure 1 for data from all M1  
207 simulations). For the BA44 montage however, lesions due R and RPI tended to increase e-mag within the  
208 ROI, whereas lesions due posterior and RAS tended to decrease e-mag (see Supplementary Figure 2 for  
209 data from all BA44 simulations).

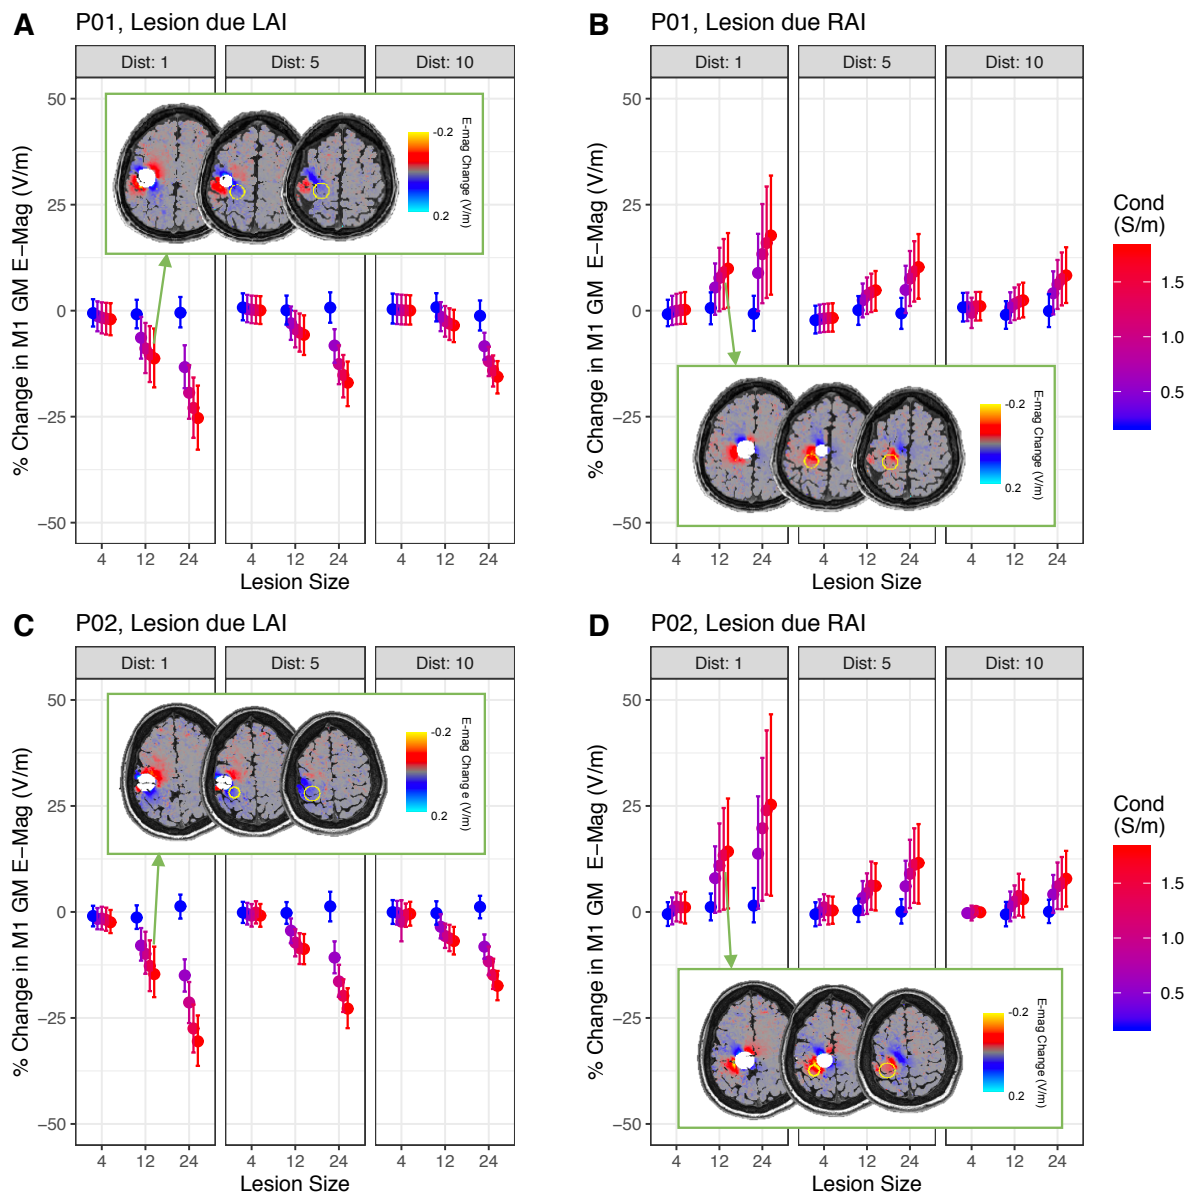

210

**Figure 4: Lesion location determined the sign of electric field magnitude (e-mag) change**

A, B: Percentage change in e-mag in M1 region of interest (ROI) caused by lesions due left-anterior-inferior (LAI) or right-anterior-inferior (RAI), with varying distances, sizes and conductivities for participant P01. Data points show mean percentage change across all ROI voxels, error bars show the 16<sup>th</sup> and 84<sup>th</sup> percentile values for change across voxels. Inset: Absolute change in e-mag across the whole brain for LAI and RAI lesions of size 12mm, distance 1mm and conductance 1.45/m.

C,D: Same as above, but for participant P02.



211 In order to quantify lesion location, and allow comparison between the two montages, the angle of lesion  
212 direction relative to the current flow in the ROI was calculated. This was performed by taking the 3D vector  
213 linking the centre of the ROI with the centre of the lesion, and the 3D vector describing the electric field  
214 direction within the ROI in the non-lesioned brain, and calculating the angle between the two. Angle of  
215 lesion location was a significant predictor of percentage change in e-mag in the M1 GM, as assessed by  
216 linear mixed model ( $t(897)=-9.31$ ,  $\beta=-0.06$ ,  $p<2.2e-16$ ), with participant as a random effect on intercept. The  
217 same relationship was found for the BA44 montage ( $t(788)=-13.3$ ,  $\beta=-0.07$ ,  $p<2.2e-16$ ). This indicates that  
218 lesions that are more aligned with the direction of current flow in the ROI tended to increase mean e-mag  
219 in the ROI, whereas those that were in the opposite direction tended to decrease e-mag.

220  
221 Combining together data from both montages, with montage as a random effect on intercept, did not  
222 change the significance of the effect of lesion location. Including montage as a fixed effect also did not  
223 result in a significant main effect of montage, or significant interaction between montage and lesion angle  
224 ( $p>0.13$ ), again indicating that the results are consistent across the M1 and BA44 simulations.

225

226

### 227 Interactions with lesion location

228

229 In order to assess whether the effect of lesion location was modulated by the other lesion characteristics,  
230 we ran linear mixed models. These included fixed effects of angle of lesion location relative to current flow  
231 direction in the ROI, distance, size and conductivity, as well as interactions between angle of lesion  
232 location and the other variables. Participant was again included as a random effect on intercepts.

233

234 In conformity with the results outlined above, all main effects were significant. Further significant  
235 interactions between lesion location and distance (M1:  $t(891)=5.27$ ,  $\beta=0.04$ ,  $p=1.7e-7$ ; BA44:  $t(782)=6.83$ ,  
236  $\beta=0.04$ ,  $p=1.7e-11$ ), lesion location and size (M1:  $t(891)=-12.7$ ,  $\beta=-0.09$ ,  $p<2.2e-16$ ; BA44:  $t(782)=-13.0$ ,  $\beta=-$   
237  $0.11$ ,  $p<2.2e-16$ ), and lesion direction and conductance (M1:  $t(891)=-6.02$ ,  $\beta=-0.06$ ,  $p=2.6e-9$ ; BA44:  
238  $t(782)=-9.53$ ,  $\beta=-0.08$ ,  $p<2.2e-16$ ) were however found. This indicates that lesion direction had a greater  
239 effect for lesions with larger size, smaller distance from the ROI and higher conductance (see Figures 5 &  
240 6).

241

242 Including all the data, from both montages in a single analysis, with montage as a random effect on slope  
243 again did not influence the significance of the results. Furthermore, including montage as a fixed effect  
244 resulted in no significant main effect of montage and no significant interactions between montage and any  
245 of the other effects or 2-way interactions ( $p>0.25$ ). Once again, this indicates that all effects are consistent  
246 across both M1 and BA44 simulations.

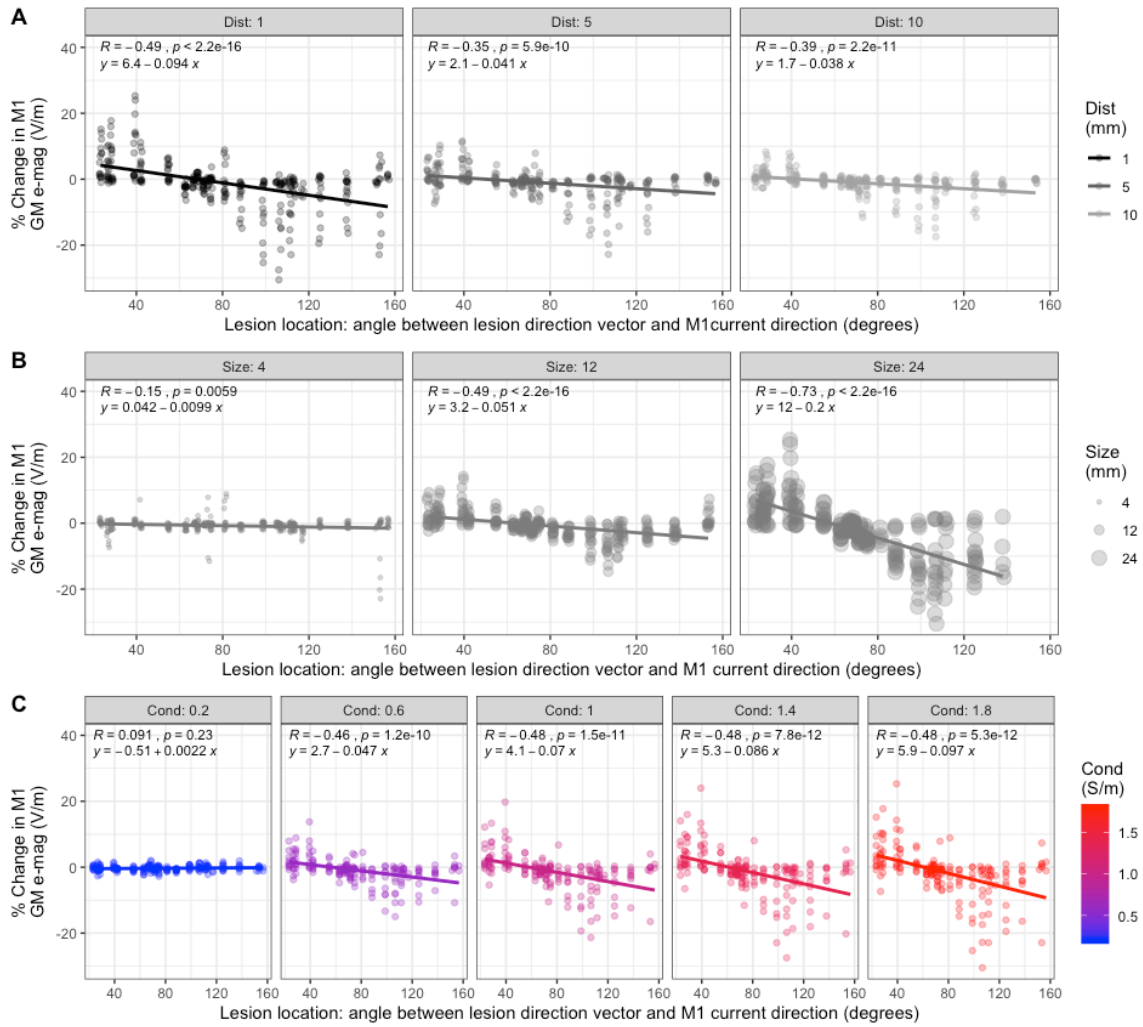

**Figure 5: Interaction between the effect of lesion location with distance, size and conductance on change in electric field magnitude (e-mag) in M1**

A: Changes in e-mag in M1 grey matter (GM) plotted against lesion location, split by lesion distance (in mm). Data from both participants are displayed, and pooled together for analysis. Lesions located in-line with the predominant orientation of current flow in M1 increased e-mag, whereas those in the opposite direction caused a decrease. This was modulated by lesion distance, where closer lesions to the ROI had a greater impact on e-mag change.

B: Changes in e-mag in M1 GM plotted against lesion location, split by lesion size (radius in mm), demonstrating that larger lesions have a greater impact on e-mag change.

C: Changes in e-mag plotted against lesion location, split by conductance (in S/m), showing that lesions with higher conductance have a greater effect on e-mag changes.

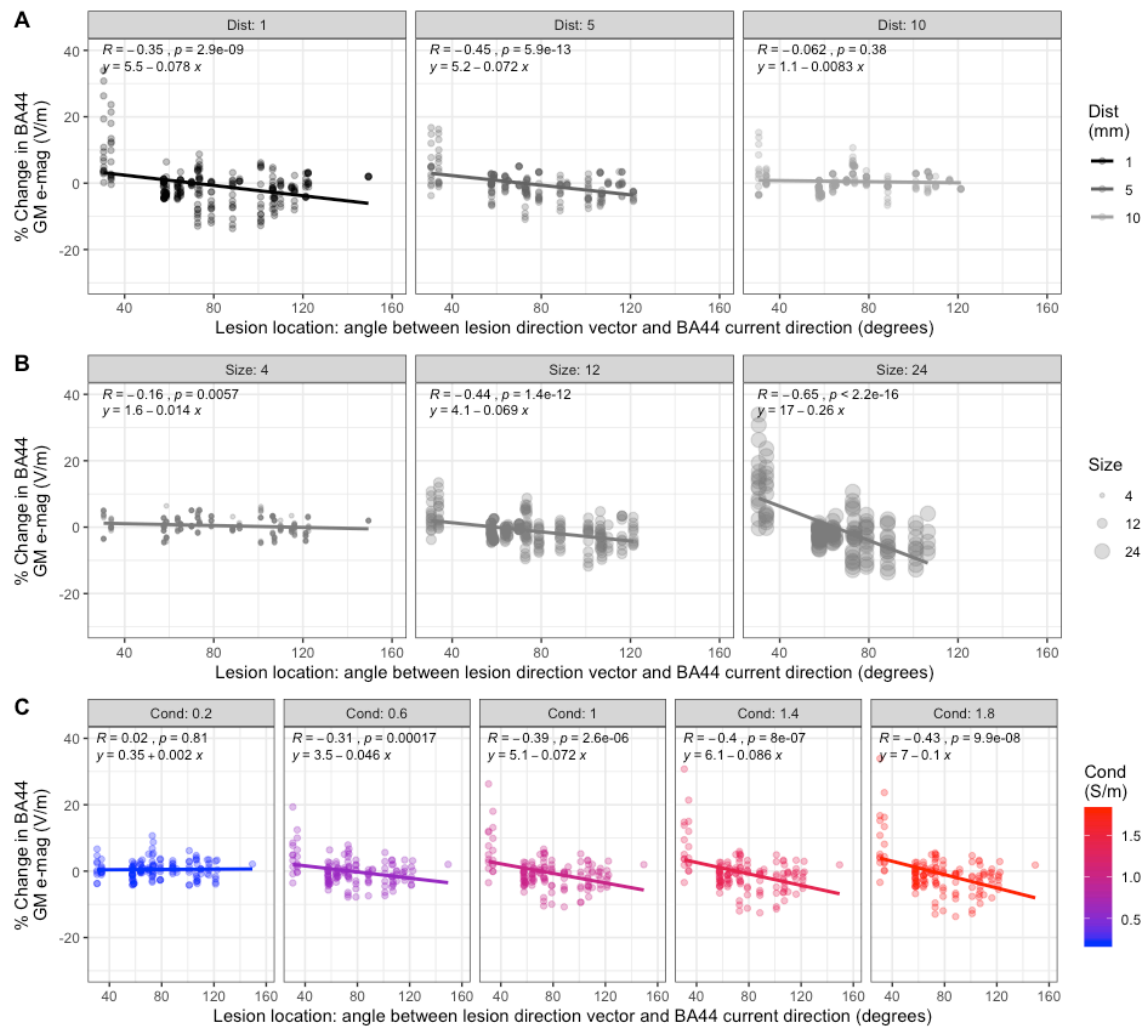

249

**Figure 6: Interaction between the effect of lesion location with distance, size and conductance on change in electric field magnitude (e-mag) in BA44**

A: Changes in e-mag in BA44 grey matter (GM) plotted against lesion location, split by lesion distance (in mm). Data from both participants are displayed, and pooled together for analysis. Lesions located in-line with the predominant orientation of current flow in BA44 increased e-mag, whereas those in the opposite direction caused a decrease. This was modulated by lesion distance, where closer lesions to the ROI had a greater impact on e-mag change.

B: Changes in e-mag in BA44 GM plotted against lesion location, split by lesion size (radius in mm), demonstrating that larger lesions have a greater impact on e-mag change.

C: Changes in e-mag plotted against lesion location, split by conductance (in S/m), showing that lesions with higher conductance have a greater effect on e-mag changes.

## 250 Discussion

251 In this study we modelled the effect of synthetic lesions on tDCS-induced electric field magnitude. We  
 252 found that distance from the ROI, size and conductance of the lesions all impacted the absolute change in  
 253 electric field magnitude, with increases or decreases of more than 30%. To further probe why some lesions  
 254 caused increases in e-mag and others decreases, we investigated the effect of lesion location. We found a  
 255 systematic effect of location, whereby lesions positioned in-line with the predominant orientation of



256 current flow in the ROI, where the ROI was located in between the anode and the lesion, tended to  
257 increase the magnitude of current flow within that ROI. Lesions that were positioned maximally out-of-line  
258 with the current flow caused a decrease in the magnitude of current flow within the ROI. This effect was  
259 modulated by the lesion distance, size and conductance. Lesions that were larger, closer to the ROI, and  
260 had a higher conductance tended to have the greatest impact - whether positive or negative - on current  
261 flow. These effects were consistent when examining both a montage targeting M1, and a montage  
262 targeting BA44. Additionally, the same pattern of results was seen in both participant's brains (see  
263 Supplementary Figures 1 and 2). Taken together, these results point towards a generalisable pattern in the  
264 influence of lesions on tDCS-induced e-mag within ROIs which could be used to guide future studies.

265  
266 The results presented here build on the findings of previous modelling studies examining the effect of  
267 lesions on tDCS-induced current flow patterns [15,21–23]. These studies used MRI scans of real stroke  
268 patients, and tended to find that lesions caused a decrease in current flow in the region of interest [15].  
269 Here we show that lesion location, with respect to the direction of current flow, is a key driver in  
270 determining the influence of the lesion on current flow, and lesions can cause increases in electric field  
271 magnitude in ROIs, as well as decreases.

272  
273 By modelling synthetic lesions in healthy brains we were able to independently manipulate several lesion  
274 parameters to determine their influence on current flow relative to the 'healthy' non-lesioned condition  
275 and to each other. This enabled control for inter-individual anatomy, which itself affects current flow, and  
276 enabled the use of a wide variety of lesion characteristics which could only be found using a very high  
277 number of real patient scans.

278

### 279 [Implications for clinical applications](#)

280 A major issue facing the adoption of brain stimulation techniques into clinical practice is the large inter-  
281 individual variability in responses. This variability is likely to be driven, at least in part, by differences in  
282 current flow through the regions of interest [34]. In addition to the high degree of variability seen across  
283 healthy individuals [13,14], here we show that large lesions will further increase this variability by up to  
284 30%. In the present case, the synthetic nature of our lesions allowed for systematic manipulation of lesion  
285 characteristics, but the variability observed here is likely to be amplified in stroke populations with their  
286 inherently variable lesion characteristics. Using current flow models to individualise tDCS protocols has  
287 been suggested as a method to counter this variability [35] either by altering the intensity of stimulation  
288 [13] or by altering electrode placement [19].

289  
290 The results presented here confirm the need to optimise protocols in order to reduce variability in electric  
291 field magnitude. Our results suggest that the distortions in current flow/electrical fields are largest in the

292 brains of patients with large lesions that are close to the region of interest, and as such the heterogeneity  
293 of lesions across patients will amplify the differences in which brain regions are targeted. While simple and  
294 freely available methods exist for performing this optimisation [13,21,27] they all rely on having a high  
295 resolution whole head MRI of each patient. Obtaining these scans is possible for small well-funded  
296 research projects but may not be feasible for large-scale clinical practice given the cost of high-field MRI.  
297 The results presented here could be used, in combination with a 2D MR image, to give some indication of  
298 whether a lesion is likely to impact the electric field magnitude in a region of interest over-and-above the  
299 normal inter-individual variability. Lesions that are small, distant or lie orthogonal to the path of current  
300 flow will have little impact on the electric field magnitude within the region of interest.

301

### 302 [Important directions for future research](#)

303 Our results also highlight the effect of assumptions about the lesion conductance on the degree of electric  
304 field change caused by a lesion. In order for current flow simulations to provide accurate estimations of  
305 electric field magnitude it is essential that appropriate conductance values be assigned to lesions. Previous  
306 work has modelled lesions as CSF, which is assigned a very high conductance [15,21–23]. In reality, lesions  
307 are not filled with pure CSF and the real conductance is therefore likely to be lower. To the authors  
308 knowledge, only one study has investigated the conductance of lesioned tissue using magnetic resonance  
309 electrical impedance tomography (MREIT) in a single patient. Here the predicted conductance value was  
310 1.2 S/m in the lesioned tissue [36]. While further research is needed to generate a robust measurement,  
311 this value is well below the 1.65 S/m typically assigned to CSF. Our results indicate that lesions with lower  
312 conductivity values have less effect on change in e-mag, but conductivities in the region of 1.2 S/m can still  
313 result in changes of 20-25%.

314

315 In addition to the outstanding question of the conductance of lesioned tissue, segmentation can also be  
316 challenging as often lesions do not have clearly defined boundaries. In reality the area typically segmented  
317 as a lesion is not homogenous tissue, but rather has a gradient from maximally damaged pure lesioned  
318 tissue, through partially affected perilesional tissue, to healthy brain [37]. Rather than having a constant  
319 conductance, it is likely that conductance varies across the lesion. Furthermore, conductance may not be  
320 stable across time following the stroke; diffusion MRI metrics, which are known to correlate with  
321 conductivity [38,39], have been shown to change in the perilesional tissue from acute to chronic stages  
322 following stroke [40,41]. In order to ascertain the true effect of lesions on tDCS-induced current flow  
323 further work is needed to identify accurate conductivity measures for accurately segmented lesioned  
324 tissue and determine whether these values change across time and distance from the lesion centre.

325

## 326 Conclusions

327 In this study we systematically modelled the influence of synthetic lesions with different locations, sizes  
328 and conductivities on the tDCS-induced electric field within two ROIs, for two individuals. Across both ROIs  
329 and individuals a general pattern emerged whereby lesions that were lying in-line with the predominant  
330 direction of current flow within the non-lesioned brain tended to increase the electric field magnitude in  
331 the ROI, while those that were in the opposite direction tended to decrease the electric field in the ROI.  
332 This effect was significantly modulated by lesion distance, size and conductance; lesions that were closer  
333 to the ROI, larger and had high conductance resulted in the greatest e-mag changes, with  
334 increases/decreases of up to 30%. These results demonstrate the potential for increased variability in  
335 current flow in the brains of patients, which could in turn impact the behavioural effects of tDCS. We also  
336 show that small lesions, far from the region of interest, have relatively little impact on electric field  
337 magnitude in the ROI. Finally, our results underline the need for improved estimates of conductivity in  
338 lesioned tissue if we are to accurately estimate the true path of current flow through the brains of patients  
339 and optimise tDCS for clinical practice.

340

## 341 Acknowledgements

342 A Johnstone is funded by the Dunhill Medical Trust [RPGF1810\93]; C Zich [201718-13], C Evans and J Lee  
343 [201617-03] are funded by Brain Research UK.

344

345

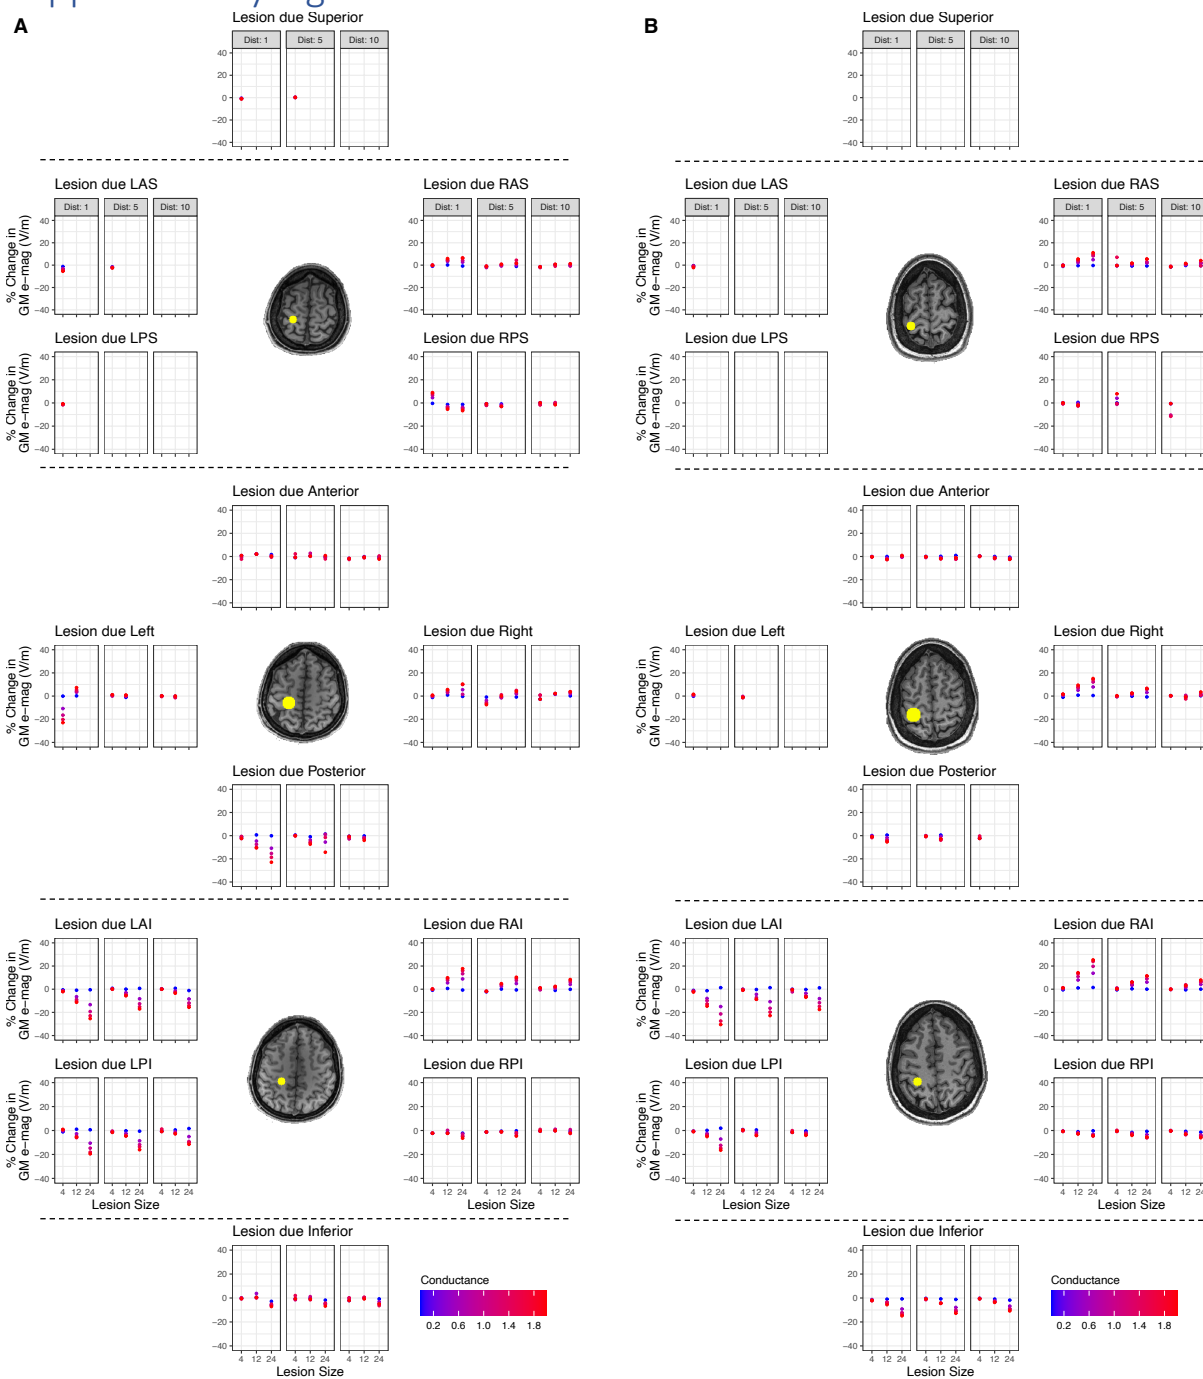

347

348

**Supplementary Figure 1: Percentage change in M1 electric field magnitude (e-mag) for all lesions**

A: Percentage change in e-mag for all lesion locations, sizes (in mm), distances (in mm), and conductivities (in S/m) for participant P01.

B: Same for participant P02

349

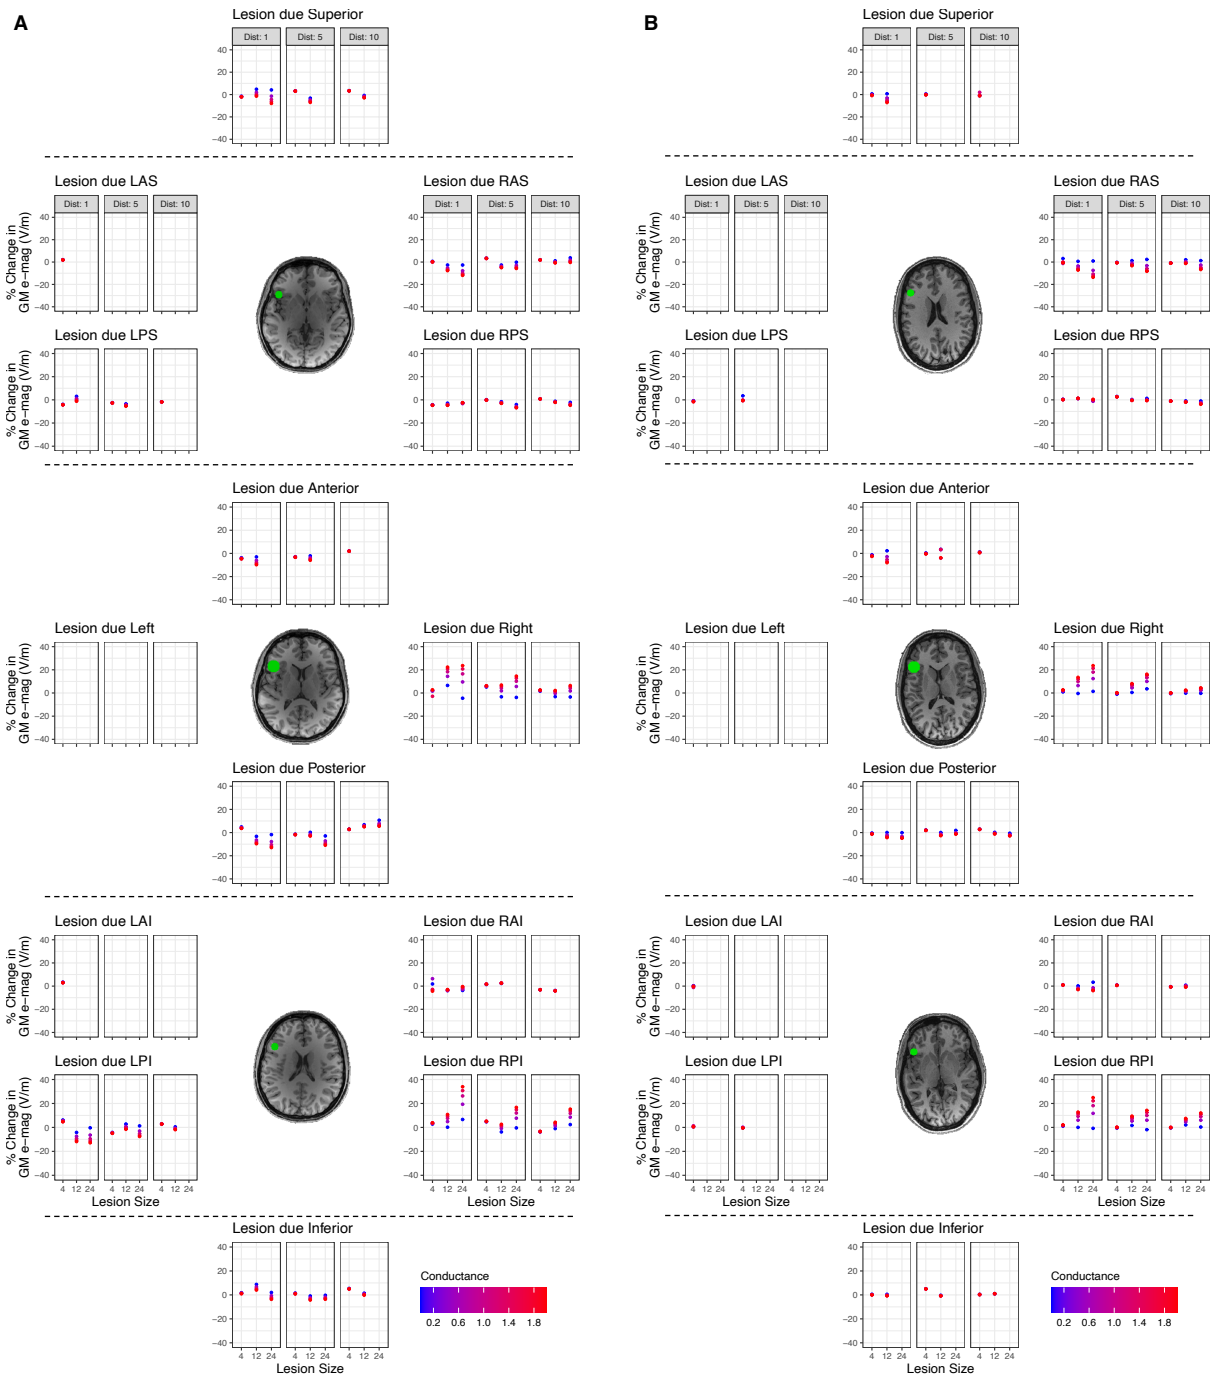

350

351

**Supplementary Figure 2: Percentage change in BA44 electric field magnitude (e-mag) for all lesions**

A: Percentage change in e-mag for all lesion locations, sizes (in mm), distances (in mm), and conductivities (in S/m) for participant P01.

B: Same for participant P02

352

## 353 Bibliography

354

- 355 [1] Kang N, Summers JJ, Cauraugh JH. Transcranial direct current stimulation facilitates motor learning post-  
356 stroke: a systematic review and meta-analysis. *J Neurol Neurosurg Psychiatry* 2015;jnnp-2015.
- 357 [2] Stagg CJ, Bachtiar V, O’Shea J, Allman C, Bosnell RA, Kischka U, et al. Cortical activation changes  
358 underlying stimulation-induced behavioural gains in chronic stroke. *Brain* 2012;135:276.  
359 <https://doi.org/10.1093/brain/awr313>.
- 360 [3] Hummel F, Celnik P, Giraux P, Floel A, Wu WH, Gerloff C, et al. Effects of non-invasive cortical  
361 stimulation on skilled motor function in chronic stroke. *Brain* 2005;128.  
362 <https://doi.org/10.1093/brain/awh369>.
- 363 [4] Hummel FC, Voller B, Celnik P, Floel A, Giraux P, Gerloff C, et al. Effects of brain polarization on reaction  
364 times and pinch force in chronic stroke. *BMC Neurosci* 2006;7:1–10. <https://doi.org/10.1186/1471-2202-7-73>.
- 366 [5] Butler AJ, Shuster M, O’Hara E, Hurley K, Middlebrooks D, Guilkey K. A meta-analysis of the efficacy of  
367 anodal transcranial direct current stimulation for upper limb motor recovery in stroke survivors. *J Hand  
368 Ther* 2013;26:162–71. <https://doi.org/10.1016/j.jht.2012.07.002>.
- 369 [6] Allman C, Amadi U, Winkler AM, Wilkins L, Filippini N, Kischka U, et al. Ipsilesional anodal tDCS enhances  
370 the functional benefits of rehabilitation in patients after stroke. *Sci Transl Med* 2016;8:330re1.  
371 <https://doi.org/10.1126/scitranslmed.aad5651>.
- 372 [7] Galletta, Conner P, Vogel A, Marangolo P. Use of tDCS in Aphasia Rehabilitation: A Systematic Review of  
373 the Behavioral Interventions Implemented With Noninvasive Brain Stimulation for Language Recovery.  
374 *Am J Speech-Language Pathol* 2016;25:S854–67. [https://doi.org/10.1044/2016\\_AJSLP-15-0133](https://doi.org/10.1044/2016_AJSLP-15-0133).
- 375 [8] Holland R, Crinion J. Can tDCS enhance treatment of aphasia after stroke? *Aphasiology* 2012;26:1169–  
376 91. <https://doi.org/10.1080/02687038.2011.616925>.
- 377 [9] Holland R, Leff AP, Josephs O, Galea JM, Desikan M, Price CJ, et al. Speech facilitation by left inferior  
378 frontal cortex stimulation. *Curr Biol* 2011;21:1403–7.
- 379 [10] Johnstone A, Levenstein JM, Hinson EL, Stagg CJ. Neurochemical changes underpinning the  
380 development of adjunct therapies in recovery after stroke: A role for GABA? *J Cereb Blood Flow Metab*  
381 2017;0271678X17727670. <https://doi.org/10.1177/0271678X17727670>.
- 382 [11] Wiethoff S, Hamada M, Rothwell JC. Variability in response to transcranial direct current stimulation of  
383 the motor cortex. *Brain Stimul* 2014;7:468–75.
- 384 [12] Elsner B, Kugler J, Pohl M, Mehrholz J. Transcranial direct current stimulation for improving spasticity  
385 after stroke: a systematic review with meta-analysis. *J Rehabil Med* 2016;48:565–70.
- 386 [13] Evans C, Bachmann C, Lee J, Gregoriou E, Ward N, Bestmann S. Dose-controlled tDCS reduces electric  
387 field intensity variability at a cortical target site. *Brain Stimul* 2020.
- 388 [14] Laakso I, Tanaka S, Koyama S, De Santis V, Hirata A. Inter-subject Variability in Electric Fields of Motor  
389 Cortical tDCS. *Brain Stimul Basic, Transl Clin Res Neuromodulation* 2015;8:906–13.  
390 <https://doi.org/10.1016/j.brs.2015.05.002>.
- 391 [15] Minjoli S, Saturnino GB, Blicher JU, Stagg CJ, Siebner HR, Antunes A, et al. The impact of large structural  
392 brain changes in chronic stroke patients on the electric field caused by transcranial brain stimulation.  
393 *NeuroImage Clin* 2017;15:106–17.
- 394 [16] McCann H, Pisano G, Beltrachini L. Variation in Reported Human Head Tissue Electrical Conductivity  
395 Values. *Brain Topogr* 2019;32:825–58. <https://doi.org/10.1007/s10548-019-00710-2>.
- 396 [17] Huang Y, Datta A, Bikson M, Parra LC. Realistic vOlumetric-Approach to Simulate Transcranial Electric  
397 Stimulation -- ROAST -- a fully automated open-source pipeline. *BioRxiv* 2017.  
398 <https://doi.org/10.1101/217331>.
- 399 [18] Thielscher A, Antunes A, Saturnino GB. Field modeling for transcranial magnetic stimulation: a useful  
400 tool to understand the physiological effects of TMS? 2015 37th Annu. Int. Conf. IEEE Eng. Med. Biol.  
401 Soc., IEEE; 2015, p. 222–5.
- 402 [19] Dmochowski JP, Datta A, Bikson M, Su Y, Parra LC. Optimized multi-electrode stimulation increases  
403 focality and intensity at target. *J Neural Eng* 2011;8:46011.
- 404 [20] Huang Y, Thomas C, Datta A, Parra LC. Optimized tDCS for targeting multiple brain regions: an integrated  
405 implementation. 2018 40th Annu. Int. Conf. IEEE Eng. Med. Biol. Soc., IEEE; 2018, p. 3545–8.
- 406 [21] Dmochowski JP, Datta A, Huang Y, Richardson JD, Bikson M, Fridriksson J, et al. Targeted transcranial  
407 direct current stimulation for rehabilitation after stroke. *Neuroimage* 2013;75:12–9.
- 408 [22] Datta A, Baker JM, Bikson M, Fridriksson J. Individualized model predicts brain current flow during

409 transcranial direct-current stimulation treatment in responsive stroke patient. *Brain Stimul Basic, Transl*  
410 *Clin Res Neuromodulation* 2011;4:169–74.

411 [23] Galletta EE, Cancelli A, Cottone C, Simonelli I, Tecchio F, Bikson M, et al. Use of computational modeling  
412 to inform tDCS electrode montages for the promotion of language recovery in post-stroke aphasia. *Brain*  
413 *Stimul Basic, Transl Clin Res Neuromodulation* 2015;8:1108–15.

414 [24] Kim D-E, Park J-H, Schellingerhout D, Ryu W-S, Lee S-K, Jang MU, et al. Mapping the Supratentorial  
415 Cerebral Arterial Territories Using 1160 Large Artery Infarcts. *JAMA Neurol* 2019;76:72–80.  
416 <https://doi.org/10.1001/jamaneurol.2018.2808>.

417 [25] Hope TMH, Seghier ML, Leff AP, Price CJ. Predicting outcome and recovery after stroke with lesions  
418 extracted from MRI images. *NeuroImage Clin* 2013;2:424–33.  
419 <https://doi.org/https://doi.org/10.1016/j.nicl.2013.03.005>.

420 [26] Zhao L, Biesbroek JM, Shi L, Liu W, Kuijf HJ, Chu WW, et al. Strategic infarct location for post-stroke  
421 cognitive impairment: A multivariate lesion-symptom mapping study. *J Cereb Blood Flow Metab*  
422 2018;38:1299–311. <https://doi.org/10.1177/0271678X17728162>.

423 [27] Huang Y, Datta A, Bikson M, Parra LC. Realistic vOlumetric-Approach to Simulate Transcranial Electric  
424 Stimulation--ROAST--a fully automated open-source pipeline. *J Neural Eng* 2019.

425 [28] Fang Q, Boas DA. Tetrahedral mesh generation from volumetric binary and grayscale images. 2009 IEEE  
426 *Int. Symp. Biomed. Imaging From Nano to Macro*, leee; 2009, p. 1142–5.

427 [29] Amadi U, Allman C, Johansen-Berg H, Stagg CJ. The Homeostatic Interaction Between Anodal  
428 Transcranial Direct Current Stimulation and Motor Learning in Humans is Related to GABAA Activity.  
429 *Brain Stimul* 2015;8:898–905. <https://doi.org/10.1016/j.brs.2015.04.010>.

430 [30] O’Shea J, Boudrias M-H, Stagg CJ, Bachtiar V, Kischka U, Blicher JU, et al. Predicting behavioural  
431 response to TDCS in chronic motor stroke. *Neuro-Enhancement* 2014;85, Part 3:924–33.  
432 <https://doi.org/10.1016/j.neuroimage.2013.05.096>.

433 [31] Fridriksson J, Richardson JD, Baker JM, Rorden C. Transcranial direct current stimulation improves  
434 naming reaction time in fluent aphasia: a double-blind, sham-controlled study. *Stroke* 2011;42:819–21.

435 [32] Baker JM, Rorden C, Fridriksson J. Using transcranial direct-current stimulation to treat stroke patients  
436 with aphasia. *Stroke* 2010;41:1229–36.

437 [33] Jenkinson M, Beckmann CF, Behrens TEJ, Woolrich MW, Smith SM. FSL. 20 YEARS FMRI 2012;62:782–  
438 90. <https://doi.org/10.1016/j.neuroimage.2011.09.015>.

439 [34] Laakso I, Mikkonen M, Koyama S, Ito D, Yamaguchi T, Hirata A, et al. Electric field dependent effects of  
440 motor cortical TDCS. *BioRxiv* 2018. <https://doi.org/10.1101/327361>.

441 [35] Bestmann S, Ward N. Are current flow models for transcranial electrical stimulation fit for purpose?  
442 *Brain Stimul* 2017;10:865–6. <https://doi.org/10.1016/j.brs.2017.04.002>.

443 [36] van Lier A, Kolk A, Brundel M, Hendriske J, Luijten J, Lagendijk J, et al. Electrical conductivity in ischemic  
444 stroke at 7.0 Tesla: a case study. *Proc. 20th Sci. Meet. Int. Soc. Magn. Reson. Med.*, vol. 3484, 2012.

445 [37] Rekić I, Allasonnière S, Carpenter TK, Wardlaw JM. Medical image analysis methods in MR/CT-imaged  
446 acute-subacute ischemic stroke lesion: Segmentation, prediction and insights into dynamic evolution  
447 simulation models. A critical appraisal. *NeuroImage Clin* 2012;1:164–78.

448 [38] Tuch DS, Wedeen van J, Dale AM, George JS, Belliveau JW. Conductivity mapping of biological tissue  
449 using diffusion MRI. *Ann N Y Acad Sci* 1999;888:314–6.

450 [39] Tuch DS, Wedeen VJ, Dale AM, George JS, Belliveau JW. Conductivity tensor mapping of the human  
451 brain using diffusion tensor MRI. *Proc Natl Acad Sci* 2001;98:11697–701.

452 [40] Thiel CM, Zilles K, Fink GR. Cerebral correlates of alerting, orienting and reorienting of visuospatial  
453 attention: an event-related fMRI study. *Neuroimage* 2004;21.  
454 <https://doi.org/10.1016/j.neuroimage.2003.08.044>.

455 [41] van der Zijden JP, van der Toorn A, van der Marel K, Dijkhuizen RM. Longitudinal in vivo MRI of  
456 alterations in perilesional tissue after transient ischemic stroke in rats. *Exp Neurol* 2008;212:207–12.  
457
